# Supplementary material for: Why Is the Correct Selection of Trichoderma Strains Important? The Case of Wheat Endophytic Strains of T. harzianum and T. simmonsii
Source: MDPI journal article supplement (doi:10.3390/jof7121087), 2021-12-17
Supplement: s1 [file s1]

**Table S1.** Growth of 54 fungal isolates, obtained from the root endosphere of wheat Berdun, in potato dextrose broth (PDB) medium with 0, 10, 20, 30, or 40% (vol/vol) polyethylene glycol (PEG). The genus was assigned by analyzing of the ITS1-ITS4 region sequence.

| Isolate | Genus                | PDB | PDB+10%<br>PEG | PDB+20%<br>PEG | PDB+30%<br>PEG | PDB+40%<br>PEG |
|---------|----------------------|-----|----------------|----------------|----------------|----------------|
| 1       | <i>Fusarium</i>      | ++  | +++            | ++             | ++             | ++             |
| 2       | <i>Fusarium</i>      | +++ | +++            | ++             | ++             | ++             |
| 3       | <i>Rhizopus</i>      | +++ | +++            | +++            | +++            | +++            |
| 4       | <i>Microdochium</i>  | +++ | ++++           | ++++           | ++             | +              |
| 5       | <i>Fusarium</i>      | -   | -              | -              | -              | -              |
| 6       | <i>Alternaria</i>    | +++ | +++            | ++             | +              | +              |
| 7       | <i>Aspergillus</i>   | ++  | ++             | +++            | +++            | +++            |
| 8       | <i>Penicillium</i>   | ++  | +++            | ++++           | ++++           | +++            |
| 9       | <i>Fusarium</i>      | +   | +              | +              | +              | +              |
| 10      | <i>Monosporascus</i> | +++ | ++             | +              | -              | -              |
| 11      | <i>Alternaria</i>    | +   | +              | +              | +              | +              |
| 12      | <i>Actinomucor</i>   | +++ | +++            | ++             | ++             | ++             |
| 13      | <i>Fusarium</i>      | -   | -              | -              | -              | -              |
| 14      | <i>Monosporascus</i> | -   | -              | -              | -              | -              |
| 15      | <i>Actinomucor</i>   | ++  | ++             | ++             | +              | +              |
| 16      | <i>Monosporascus</i> | -   | -              | -              | -              | -              |
| 17      | <i>Sordaria</i>      | +   | +              | ++             | +              | -              |
| 18      | <i>Macrophomina</i>  | +++ | ++             | ++             | +              | +              |
| 19      | <i>Alternaria</i>    | ++  | ++             | ++             | +              | -              |
| 20      | <i>Alternaria</i>    | +   | +              | +              | +              | +              |
| 21      | <i>Fusarium</i>      | ++  | ++             | ++             | ++             | ++             |
| 22      | <i>Alternaria</i>    | +   | +              | +              | +              | -              |
| 23      | <i>Periconia</i>     | -   | -              | -              | -              | -              |
| 24      | <i>Alternaria</i>    | ++  | ++             | +              | +              | -              |
| 25      | <i>Fusarium</i>      | +   | +              | +              | +              | +              |
| 26      | <i>Fusarium</i>      | +   | +              | +              | +              | +              |
| 27      | <i>Fusarium</i>      | +   | +              | +              | +              | +              |
| 28      | <i>Fusarium</i>      | -   | -              | -              | -              | -              |
| 29      | <i>Trichoderma</i>   | +++ | ++             | ++             | +              | +              |
| 30      | <i>Fusarium</i>      | ++  | ++             | ++             | +              | +              |
| 31      | <i>Fusarium</i>      | ++  | +              | +              | +              | -              |
| 32      | <i>Trichoderma</i>   | +++ | ++             | +              | +              | +              |
| 33      | <i>Waitea</i>        | +   | +              | -              | -              | -              |
| 34      | <i>Fusarium</i>      | -   | -              | -              | -              | -              |
| 35      | <i>Fusarium</i>      | +   | -              | -              | -              | -              |
| 36      | <i>Aspergillus</i>   | +++ | +++            | ++             | +              | -              |
| 37      | <i>Diaporthe</i>     | +   | +              | -              | -              | -              |
| 38      | <i>Setophoma</i>     | -   | -              | -              | -              | -              |
| 39      | <i>Chaetomium</i>    | -   | -              | -              | -              | -              |
| 40      | <i>Monosporascus</i> | -   | -              | -              | -              | -              |
| 41      | <i>Periconia</i>     | -   | -              | -              | -              | -              |
| 42      | <i>Monosporascus</i> | -   | -              | -              | -              | -              |

|    |                      |     |     |     |    |   |
|----|----------------------|-----|-----|-----|----|---|
| 43 | <i>Monosporascus</i> | -   | -   | -   | -  | - |
| 44 | <i>Fusarium</i>      | +   | +   | +   | -  | - |
| 45 | <i>Monosporascus</i> | -   | -   | -   | -  | - |
| 46 | <i>Fusarium</i>      | -   | -   | -   | -  | - |
| 47 | <i>Fusarium</i>      | -   | -   | -   | -  | - |
| 48 | <i>Fusarium</i>      | -   | -   | -   | -  | - |
| 49 | <i>Trichoderma</i>   | ++  | ++  | +   | +  | + |
| 50 | <i>Fusarium</i>      | +   | +   | +   | -  | - |
| 51 | <i>Alternaria</i>    | +   | +   | -   | -  | - |
| 52 | <i>Fusarium</i>      | -   | -   | -   | -  | - |
| 53 | <i>Sordaria</i>      | ++  | ++  | +   | +  | - |
| 54 | <i>Trichoderma</i>   | +++ | +++ | +++ | ++ | + |

Data scale: - (no growth), + to +++ (increasing hyphal growth), and ++++ (completely bushy well).

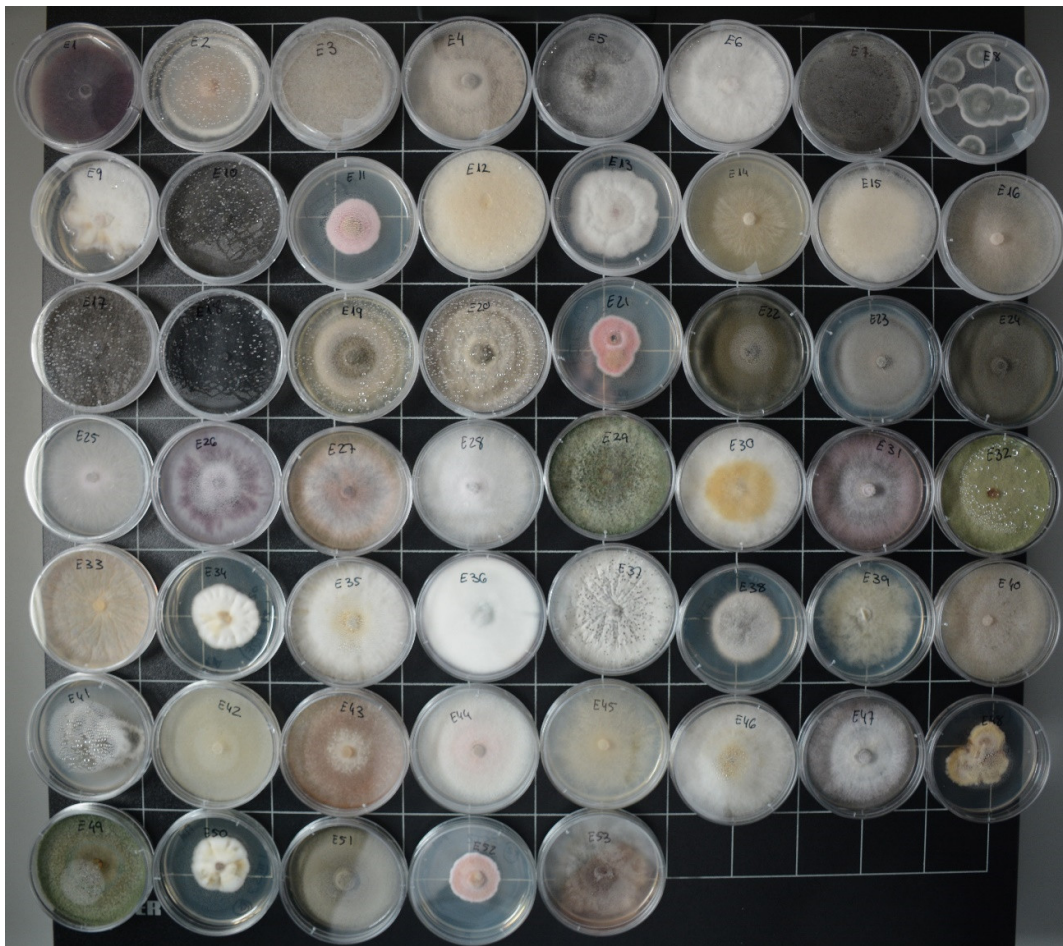

**Figure S1.** Potato dextrose agar (PDA) cultures of the 53 fungal endophytes that were obtained in this study.
